# Supplementary material
Source: publisher site journal article supplement (https://www.dovepress.com/article/373776)

| Characteristic | levels | Overall |
| --- | --- | --- |
| n |  | 374 |
| T stage, n (%) | T1 | 183 (49.0%) |
|  | T2 | 95 (25.4%) |
|  | T3 | 80 (21.4%) |
|  | T4 | 16 (4.2%) |
| N stage, n (%) | N0 | 254 (68%) |
|  | N1 | 120 (32%) |
| M stage, n (%) | M0 | 268 (71.1%) |
|  | M1 | 106 (28.3%) |
| Pathologic stage, n (%) | Stage I | 173 (49.4%) |
|  | Stage II | 87 (24.9%) |
|  | Stage III | 85 (24.3%) |
|  | Stage IV | 5 (1.4%) |
| OS event, n (%) | Alive | 244 (65.2%) |
|  | Dead | 130 (34.8%) |
| Gender, n (%) | Female | 121 (32.4%) |
|  | Male | 253 (67.6%) |
| Age, n (%) | <=60 | 177 (47.5%) |
|  | >60 | 196 (52.5%) |
| Histologic grade, n (%) | G1 | 55 (14.9%) |
|  | G2 | 178 (48.2%) |
|  | G3 | 124 (33.6%) |
|  | G4 | 12 (3.3%) |
| Age, median (IQR) |  | 61 (52, 69) |

TableS1: Clinical characteristics of the HCC patients used in the derivation cohort

| Characteristic | levels | Overall |
| --- | --- | --- |
| n |  | 100 |
| T stage, n (%) | T1 | 50 (50%) |
|  | T2 | 24 (24%) |
|  | T3 | 20 (20%) |
|  | T4 | 6 (6%) |
| N stage, n (%) | N0 | 95 (95%) |
|  | N1 | 5(5%) |
| M stage, n (%) | M0 | 97 (97%) |
|  | M1 | 3(3%) |
| Pathologic stage, n (%) | Stage I | 50 (50%) |
|  | Stage II | 25(25%) |
|  | Stage III | 20 (20%) |
|  | Stage IV | 5 (5%) |
| OS event, n (%) | Alive | 65 (65%) |
|  | Dead | 35(35%) |
| Gender, n (%) | Female | 50(50%) |
|  | Male | 50(50%) |
| Age, n (%) | <=60 | 45 (45%) |
|  | >60 | 55 (55%) |
| Histologic grade, n (%) | G1 | 55 (55%) |
|  | G2 | 20(20%) |
|  | G3 | 10 (10%) |
|  | G4 | 15(15%) |
| Age, median (IQR) |  | 58 (51, 65) |

TableS2: Clinical characteristics of the HCC patients used in the validation cohort

| Characteristics | Univariate analysis | |  | Multivariate analysis | |
| --- | --- | --- | --- | --- | --- |
| Hazard ratio (95% CI) | P value | Hazard ratio (95% CI) | P value |
| T stage |  |  |  |  |  |
| T1 | Reference |  |  |  |  |
| T2 | 1.428 (0.901-2.264) | 0.129 |  | 1.549 (0.859-2.792) | 0.146 |
| T3&T4 | 2.949 (1.982-4.386) | <0.001 |  | 1.980 (0.262-14.973) | 0.508 |
| N stage |  |  |  |  |  |
| N0 | Reference |  |  |  |  |
| N1 | 2.029 (0.497-8.281) | 0.324 |  |  |  |
| M stage |  |  |  |  |  |
| M0 | Reference |  |  |  |  |
| M1 | 4.077 (1.281-12.973) | 0.017 |  | 2.059 (0.632-6.715) | 0.231 |
| Pathologic stage |  |  |  |  |  |
| Stage I&Stage II | Reference |  |  |  |  |
| Stage III&Stage IV | 2.504 (1.727-3.631) | <0.001 |  | 1.660 (0.227-12.142) | 0.617 |
| Riskscore |  |  |  |  |  |
| Low | Reference |  |  |  |  |
| High | 1.406 (1.254-1.604) | 0.028 |  | 1.591 (1.412-1.795) | 0.023 |
| Age |  |  |  |  |  |
| <=60 | Reference |  |  |  |  |
| >60 | 1.635 (1.350-1.881) | 0.03 |  | 1.749 (1.427-1.973) | 0.03 |
| Gender |  |  |  |  |  |
| Female | Reference |  |  |  |  |
| Male | 0.793 (0.557-1.130) | 0.200 |  |  |  |

TableS3: The model was found to be an independent factor affecting OS in patients with HCC in both univariate and multifactorial Cox regression analyses.

Sup.Fig.S1. A: Pathway Activity module presents the difference of genes expression between pathway activity groups (activation and inhibition) that defined by pathway scores.B: Pathway relation network analysis.


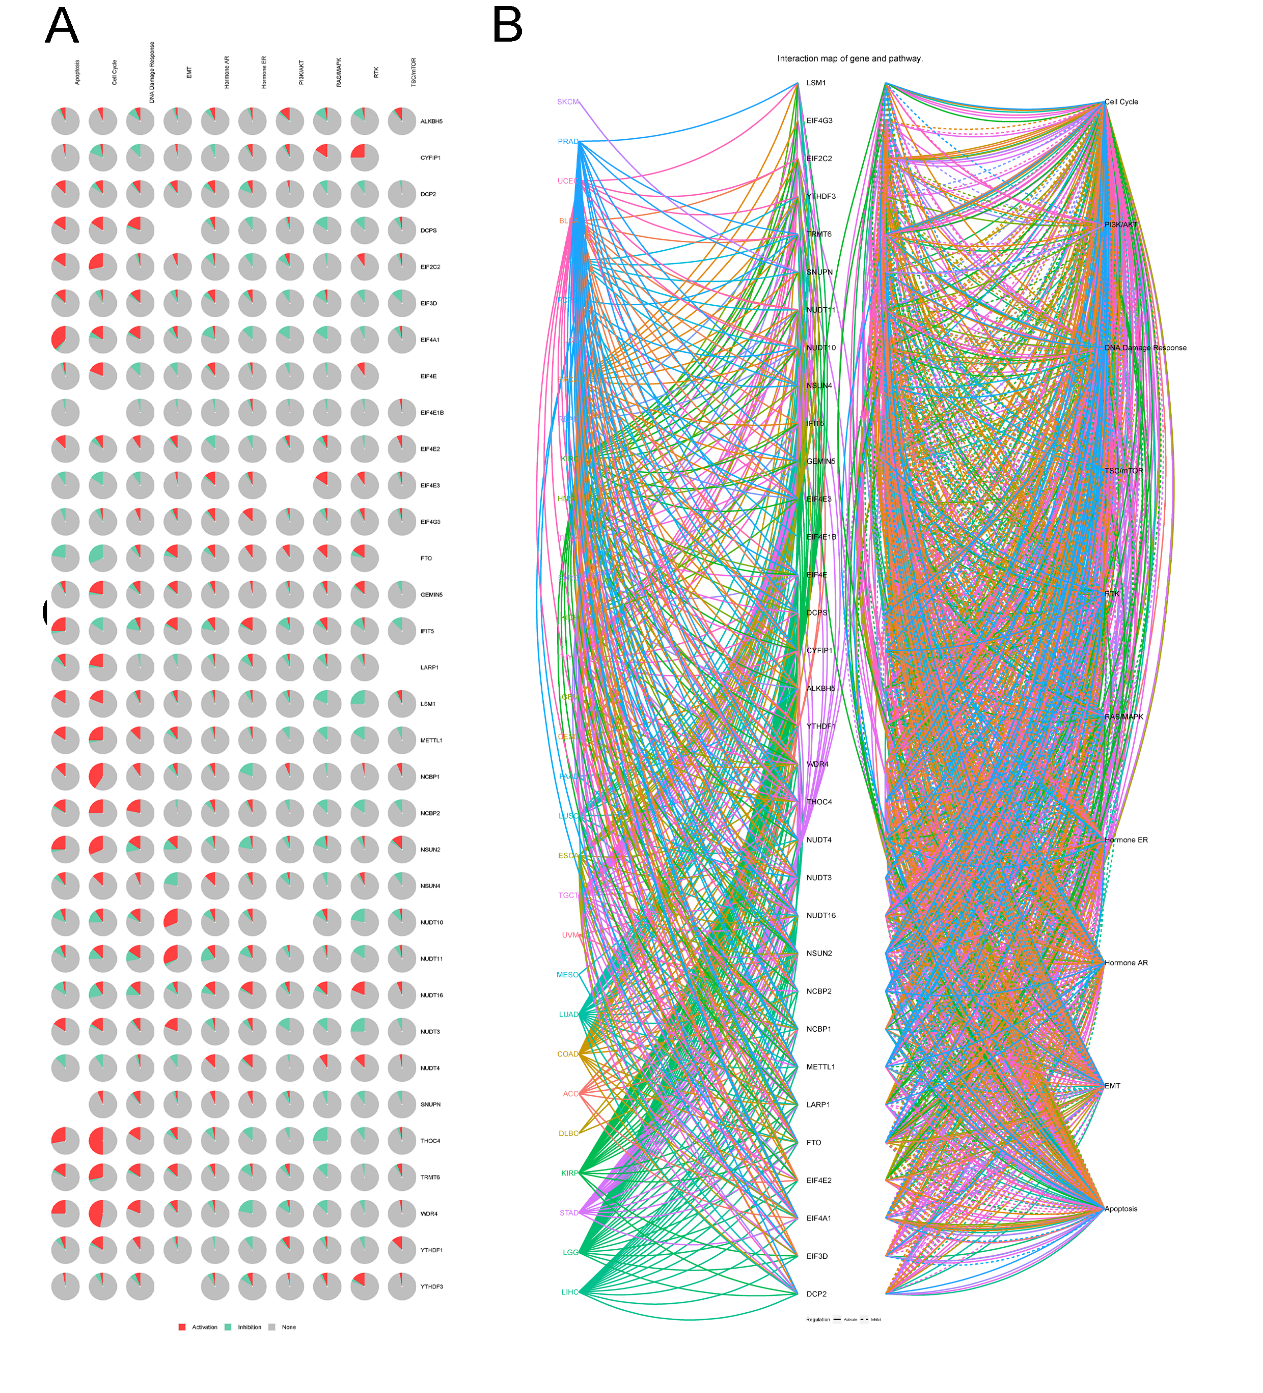


Sup.Fig.S2. Visualize the potential regulation of miRNAs to genes.


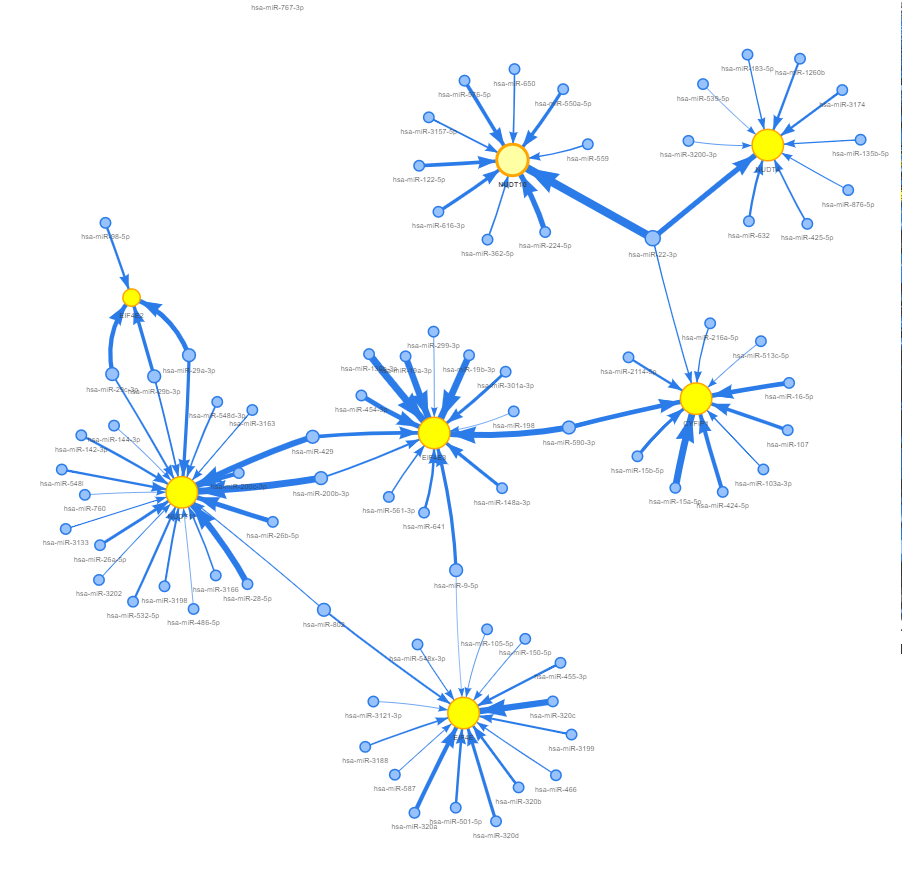


Sup.Fig.S3. A. Box plot compare the GSVA score between tumor and normal samples.B. Figure summarizes the results of survival difference between GSVA score groups in selected cancers.C. Trend of GSVA score between stages in the selected cancers.D. Figure summarizes the association between GSVA score and activity of cancer related pathways in selected cancers. *: P value ≤ 0.05; #: FDR ≤ 0.05


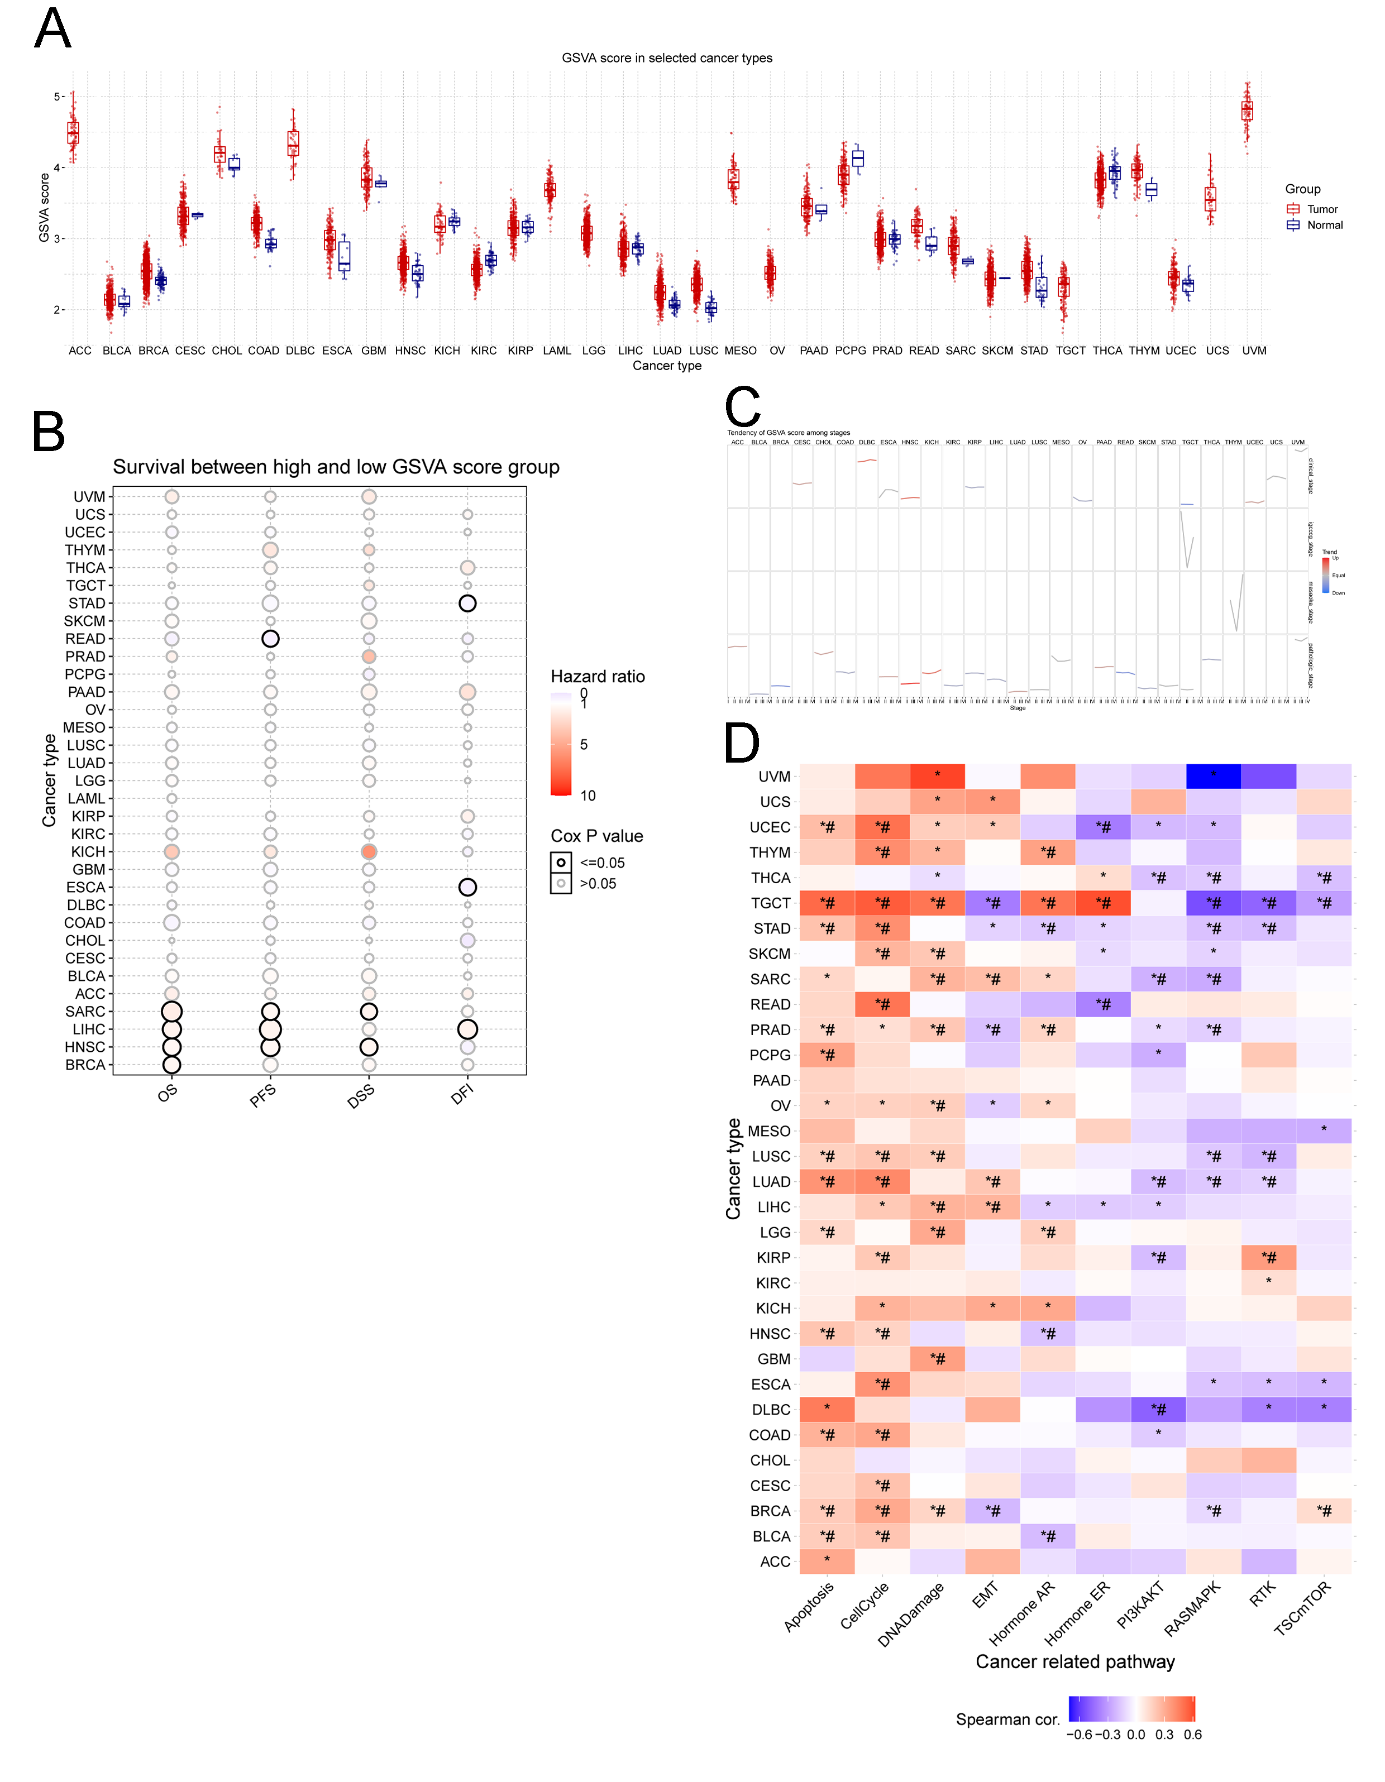


Sup.Fig.S4.Figure summarizes the association between GSVA score and activity of cancer related pathways in selected cancers. *: P value ≤ 0.05; #: FDR ≤ 0.05


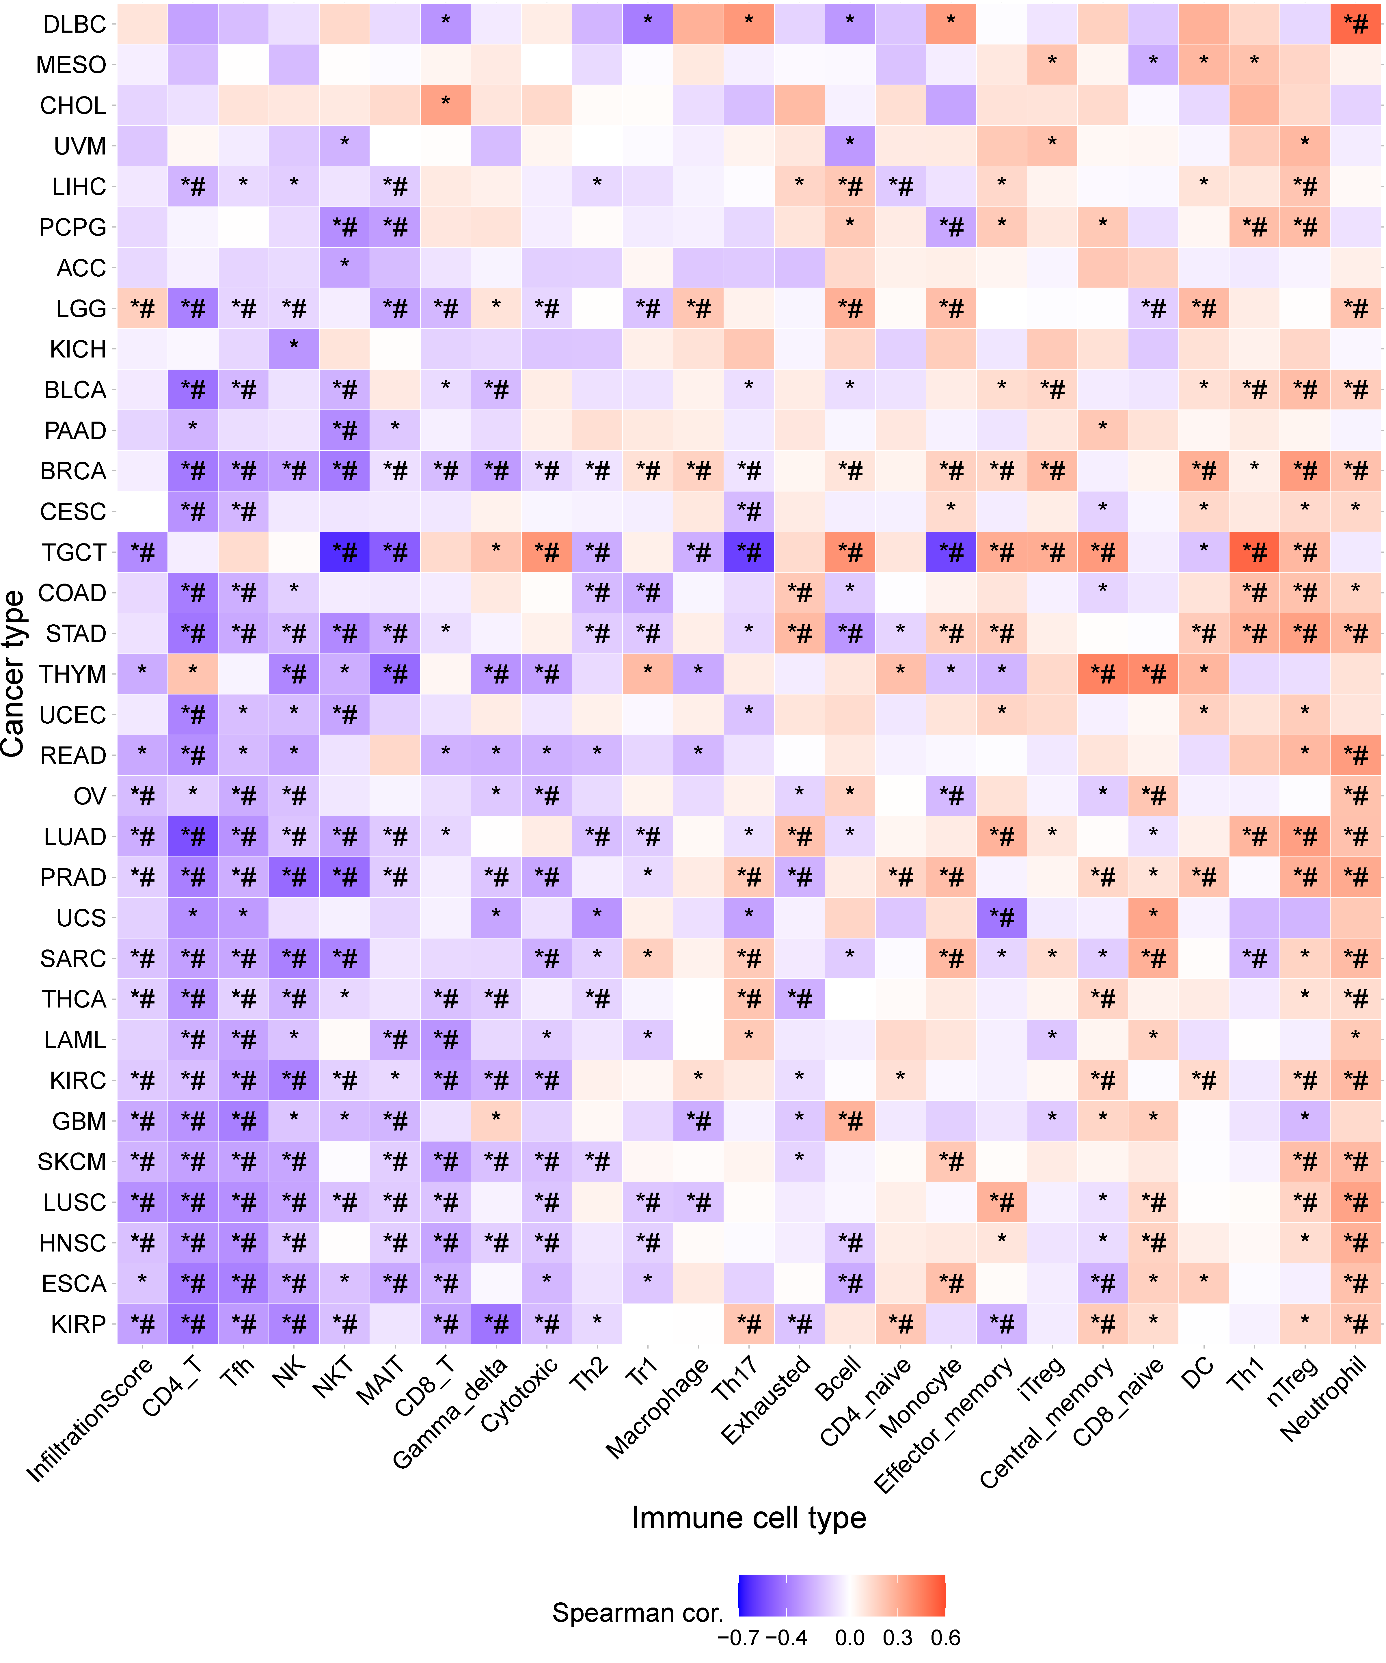

Supplement: Supplementary file 1 [file get_supplementary_file.php]
